# Supplementary material
Source: PubMed Central journal article supplement (PMC4299935)

# Parameter Sweep

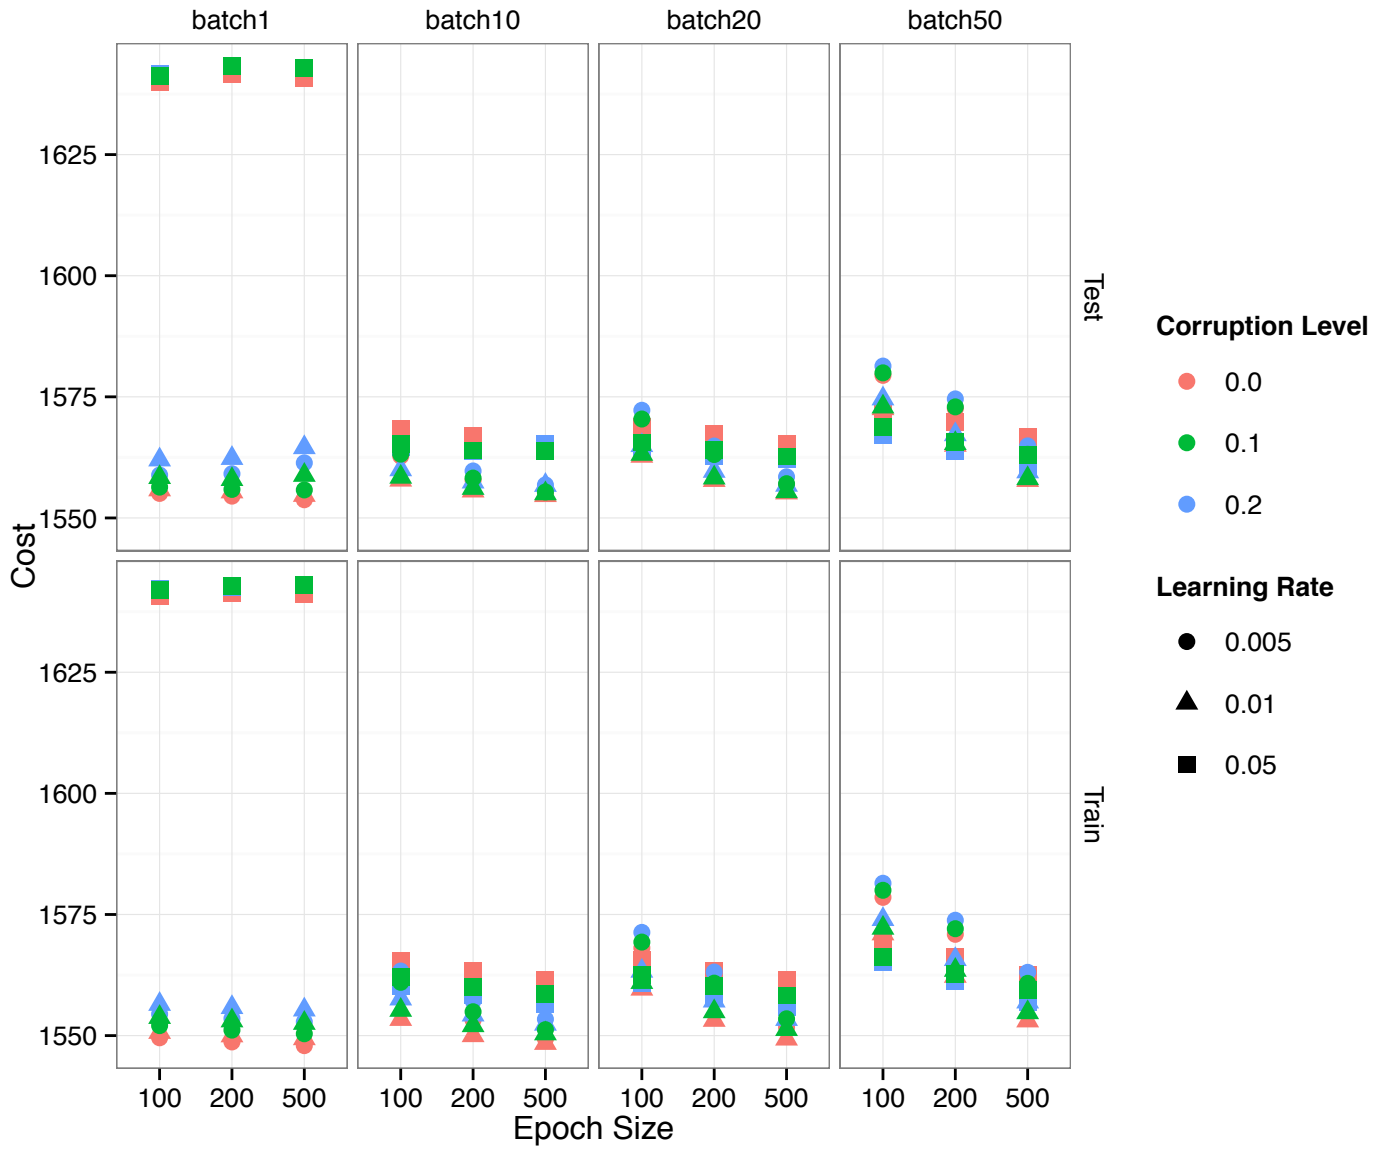

This figure shows the results of the full factorial parameter sweep.

Supplement: NIHMS642080-supplement-Arrays.pdf [file NIHMS642080-supplement-Arrays.pdf]
